# Supplementary material
Source: MDPI journal article supplement (https://www.mdpi.com/2073-4344/10/2/191)
Supplement: s1 [file s1]

## Supporting Information

# Comparing the Nature of the Active Sites in Cu-loaded SAPO-34 and SSZ-13 for the Direct Conversion of Methane to Methanol

Karoline Kvande<sup>1,\*</sup>, Dimitrios K. Pappas<sup>1</sup>, Michael Dyballa<sup>1</sup>, Carlo Buono<sup>1</sup>, Matteo Signorile<sup>2</sup>, Elisa Borfecchia<sup>2</sup>, Kirill A. Lomachenko<sup>3</sup>, Bjørnar Arstad<sup>4</sup>, Silvia Bordiga<sup>2</sup>, Gloria Berlier<sup>2</sup>, Unni Olsbye<sup>1</sup>, Pablo Beato<sup>5</sup>, Stian Svelle<sup>1</sup>

<sup>1</sup> Center for Materials Science and Nanotechnology (SMN), Department of Chemistry, University of Oslo, 1033 Blindern, 0315, Oslo, Norway

<sup>2</sup> Department of Chemistry, NIS Center and INSTM Reference Center, University of Turin, via P. Giuria 7, 10125 Turin, Italy

<sup>3</sup> European Synchrotron Radiation Facility, 71 avenue des Martyrs, CS 40220, 38043 Grenoble Cedex 9, France

<sup>4</sup> SINTEF Industry, Department of Process Technology, Forskningsveien 1, 0373 Oslo, Norway

<sup>5</sup> Haldor Topsøe A/S, Haldor Topsøes Allé 1, DK-2800 Kgs. Lyngby, Denmark

\* Correspondence: karoline.kvande@smn.uio.no (K.K.)

## Table of Contents

|     |                                                               |   |
|-----|---------------------------------------------------------------|---|
| 1   | Physico-chemical characterization.....                        | 1 |
| 1.1 | Elemental and N <sub>2</sub> -physisorption Measurements..... | 1 |
| 1.2 | Scanning Electron Microscopy (SEM).....                       | 3 |
| 1.3 | Powder X-ray Diffraction (PXRD).....                          | 3 |
| 1.4 | CO <sub>2</sub> production from CH <sub>4</sub> -TPR.....     | 5 |
| 1.5 | Raman Spectroscopy .....                                      | 5 |
| 2   | References.....                                               | 6 |

## 1 Physico-chemical characterization

### 1.1 Elemental and N<sub>2</sub>-physisorption Measurements

The results from standard characterization is reported in Table S1. The samples are denoted xCuSSZ-13 and yCuSAPO-34, where x is the Cu/Al ratio and y is the Cu/Si ratio.

**Table S1.** Elemental composition, such as (Al+P)/Si [Si/Al], Cu/Si [Cu/Al] and Cu content was determined with Energy Dispersive X-ray Spectroscopy (EDX). N<sub>2</sub>-adsorption/desorption measurements recorded at -196 °C were used to find the specific surface area (m<sup>2</sup>/g) and total pore volume (V<sub>T</sub>). Thermogravimetric analysis was used to find the water content (%).

| Sample            | Exchange Method<br>(Cu-salt)                     | (Al+P)/Si<br>[Si/Al] <sup>a</sup> | Cu/Si<br>[Cu/Al] <sup>a</sup> | Cu <sup>a</sup><br>( $\mu\text{mol/g}$ ) | Water content <sup>b</sup><br>(%) | Specific surface area <sup>c</sup><br>( $\text{m}^2/\text{g}$ ) | V <sub>T</sub> <sup>c</sup><br>( $\text{cm}^3/\text{g}$ ) |
|-------------------|--------------------------------------------------|-----------------------------------|-------------------------------|------------------------------------------|-----------------------------------|-----------------------------------------------------------------|-----------------------------------------------------------|
| 0.50Cu<br>SSZ-13  | LIE<br>(CuAc <sub>2</sub> )                      | 14.8                              | 0.53                          | 540                                      | 18                                | 770                                                             | 0.334                                                     |
| 0.25CuSAPO-<br>34 | LIE<br>(CuAc <sub>2</sub> )<br>(x3) <sup>d</sup> | 14.9                              | 0.25                          | 249                                      | 18                                | 616                                                             | 0.294                                                     |
| 0.08CuSAPO-<br>34 | LIE<br>(CuAc <sub>2</sub> )                      | 14.9                              | 0.08                          | 87                                       | 14                                | 690                                                             | 0.306                                                     |

<sup>a</sup>determined by EDX

<sup>b</sup>determined with TGA

<sup>c</sup>determined at  $p/p_0 = 0.99$

<sup>d</sup>The CuAc<sub>2</sub> solution used in the first round was 0.02 M. For the second and third round, a CuAc<sub>2</sub>-solution resulting in a Cu/Si ratio of 0.5 was used (0.008 M).

## 1.2 Scanning Electron Microscopy (SEM)

Figure S1 shows the SAPO-34 morphology at different distances.

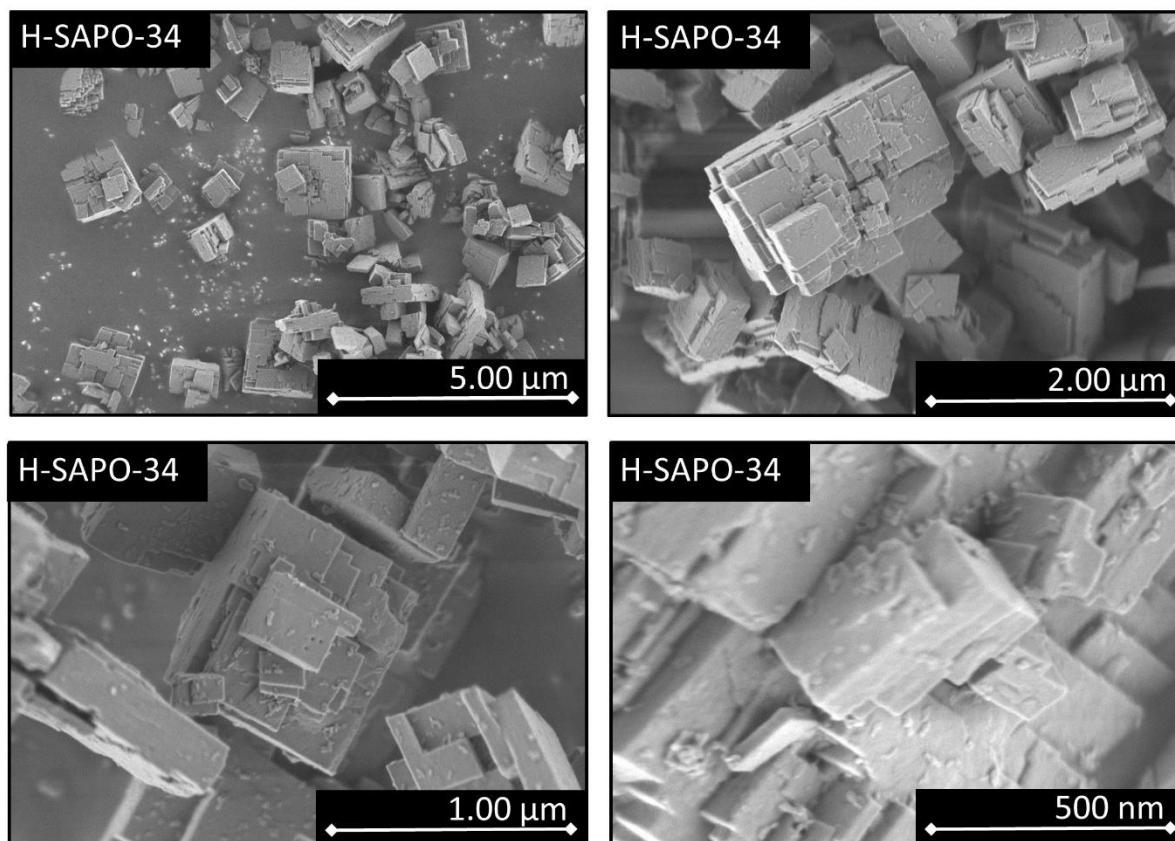

**Figure S1.** SEM-images of H-SAPO-34 at different distances. The crystals of the copper incorporated SAPO-34 materials were similar to the parent material, and are therefore not included.

## 1.3 Powder X-ray Diffraction (PXRD)

The PXRD patterns of the template containing and H-form SAPO-34 is reported in Figure S2. In Figure S3, the H-form SAPO-34 pattern is reported together with the Cu exchanged SAPO-34 samples used in this study.

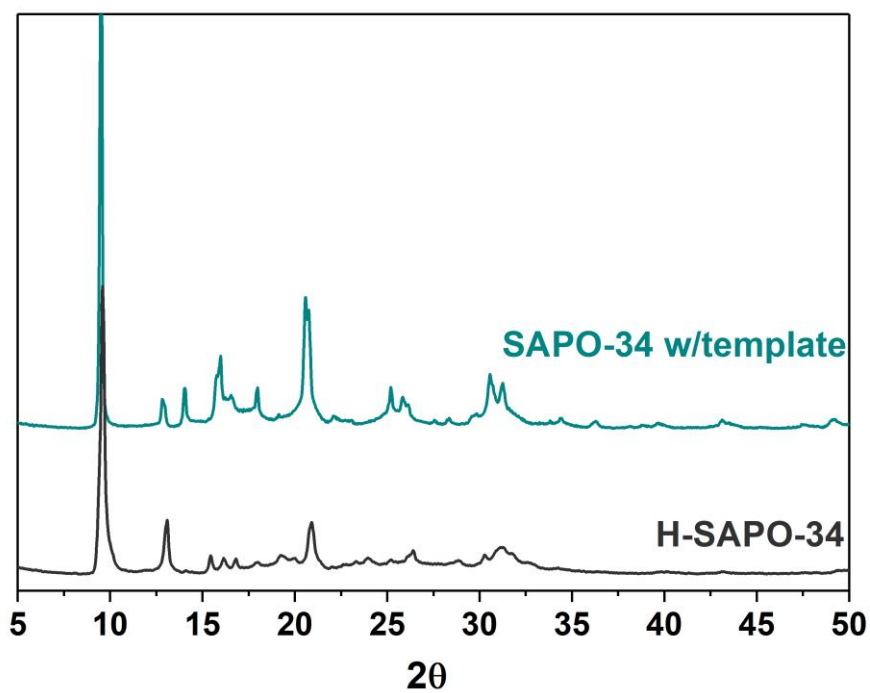

**Figure S2.** PXRD pattern of the template containing SAPO-34 (turquoise), and the calcined SAPO-34 (black). The patterns are vertically shifted for clarity.

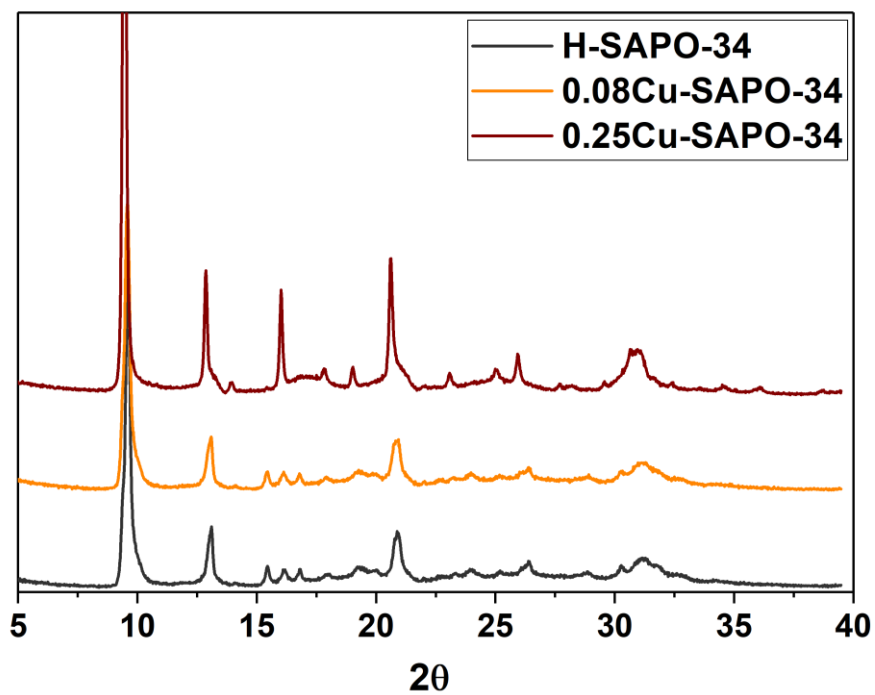

**Figure S3.** PXRD patterns of the calcined parent material (black) as well as the Cu-exchanged SAPO-34 materials, 0.08CuSAPO-34 (orange) and 0.25CuSAPO-34 (red). The patterns are vertically shifted for clarity.

#### 1.4 $\text{CO}_2$ production from $\text{CH}_4$ -TPR

Figure S4 shows the product detected after fully oxidation of methane over the three Cu-CHA samples tested in this study.

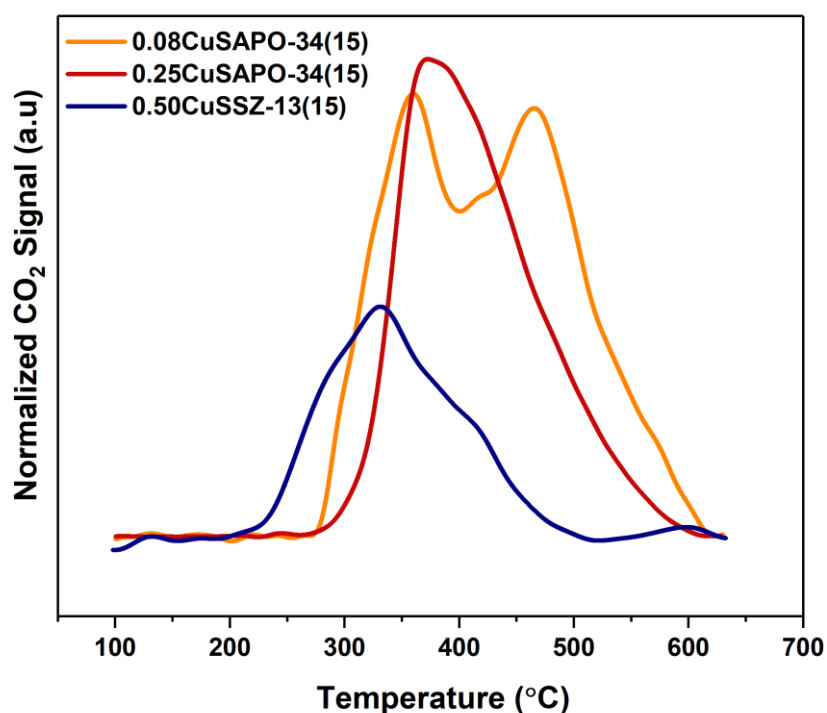

**Figure S4.**  $\text{CO}_2$  production profiles from total oxidation of  $\text{CH}_4$  over 0.50CuSSZ-13 (blue), 0.08CuSAPO-34 (orange) and 0.25CuSAPO-34 (red), measured by an online MS during flow of  $\text{CH}_4$  while heating from 100 to 650 °C (ramp: 5 °C/min). The materials were activated at 500 °C in  $\text{O}_2$  for 8 h prior to the  $\text{CH}_4$ -TPR experiment. The profiles have been normalized to the sample weight.

#### 1.5 Raman Spectroscopy

Table S2 is summary of the  $\text{Cu(II)}_x\text{O}_y$  species assigned to peaks observed in the Raman spectra.

**Table S2.** Overview of bands correlating to  $\text{Cu(II)}_x\text{O}_y$  species observed in this study, and their comparison to assignments found in literature

| SAPO-34 | SSZ-13 | Coordination | Cu(II) <sub>x</sub> O <sub>y</sub> -species        | Reference           |
|---------|--------|--------------|----------------------------------------------------|---------------------|
|         | 620    | Three-fold   | [Cu-(μ-O)-Cu] <sup>2+</sup>                        | Ipek et al. [1]     |
| 524     | 510    | Three-fold   | [Cu(trans-μ-1,2-O <sub>2</sub> )Cu] <sup>2+</sup>  | Pappas et al. [2]   |
| 587     | 580    |              |                                                    |                     |
| 812     | 830    |              |                                                    |                     |
| 549     |        | Four-fold    | [Cu(η <sup>2</sup> -O <sub>2</sub> )] <sup>+</sup> | Pappas et al. [2]   |
| 1006    | 1100   |              |                                                    |                     |
|         | 1155   | Three-fold   | [Cu(η <sup>1</sup> -O <sub>2</sub> )] <sup>+</sup> | Woertink et al. [3] |

## 2 References

- Ipek, B.; Wulfers, M. J.; Kim, H.; Göttl, F.; Hermans, I.; Smith, J. P.; Booksh, K. S.; Brown, C. M.; Lobo, R. F., Formation of [Cu<sub>2</sub>O<sub>2</sub>]<sup>2+</sup> and [Cu<sub>2</sub>O]<sup>2+</sup> toward C–H Bond Activation in Cu-SSZ-13 and Cu-SSZ-39. *ACS Catal.* **2017**, *7*, 4291-4303. [10.1021/acscatal.6b03005]
- Pappas, D. K.; Borfecchia, E.; Dyballa, M.; Pankin, I. A.; Lomachenko, K. A.; Martini, A.; Signorile, M.; Teketel, S.; Arstad, B.; Berlier, G.; Lamberti, C.; Bordiga, S.; Olsbye, U.; Lillerud, K. P.; Svelle, S.; Beato, P., Methane to Methanol: Structure-Activity Relationships for Cu-CHA. *J. Am. Chem. Soc.* **2017**, *139*, 14961-14975. [10.1021/jacs.7b06472]
- Woertink, J. S.; Smeets, P. J.; Groothaert, M. H.; Vance, M. A.; Sels, B. F.; Schoonheydt, R. A.; Solomon, E. I., A [Cu<sub>2</sub>O]<sup>2+</sup> Core in Cu-ZSM-5, the Active Site in the Oxidation of Methane to Methanol. *Proc. Natl. Acad. Sci. USA* **2009**, *106*, 18908-18913. [10.1073/pnas.0910461106]
